# Supplementary material for: Dissimilar Ligands Bind in a Similar Fashion: A Guide to Ligand Binding-Mode Prediction with Application to CELPP Studies
Source: MDPI journal article supplement (doi:10.3390/ijms222212320), 2021-11-15
Supplement: s1 [file s1]

## Supplementary Materials for

# Dissimilar Ligands Bind in a Similar Fashion: A Guide to Binding Mode Prediction with Application to CELPP Studies

Xianjin Xu, Xiaoqin Zou\*

Dalton Cardiovascular Research Center, Department of Physics and Astronomy, Department of Biochemistry, Informatics Institute, University of Missouri, Columbia, MO 65211, USA

\*Correspondence to: Xiaoqin Zou, Email: [zoux@missouri.edu](mailto:zoux@missouri.edu)

**Table S1** The constructed dataset of the protein-ligand complex structures.

| Protein family/UniProt ID       | Protein name                          | Number of PDBs |
|---------------------------------|---------------------------------------|----------------|
| <i>Peptidase A1</i>             |                                       |                |
| BACE1_HUMAN                     | Beta-secretase 1                      | 330            |
| <i>Peptidase S1</i>             |                                       |                |
| THRB_HUMAN                      | Prothrombin                           | 141            |
| TRY1_BOVIN                      | Cationic trypsin                      | 118            |
| FA10_HUMAN                      | Coagulation factor X                  | 108            |
| <i>Protein kinase</i>           |                                       |                |
| CDK2_HUMAN                      | Cyclin-dependent kinase 2             | 296            |
| MK14_HUMAN                      | Mitogen-activated protein kinase 14   | 165            |
| PIM1_HUMAN                      | Serine/threonine-protein kinase pim-1 | 128            |
| CHK1_HUMAN                      | Serine/threonine-protein kinase Chk1  | 121            |
| AURKA_HUMAN                     | Aurora kinase A                       | 83             |
| <i>Heat shock protein 90</i>    |                                       |                |
| HS90A_HUMAN                     | Heat shock protein HSP 90- $\alpha$   | 220            |
| <i>Nuclear hormone receptor</i> |                                       |                |
| ESR1_HUMAN                      | Estrogen receptor                     | 210            |
| PPARG_HUMAN                     | Peroxisome proliferator-activated     | 116            |
| <i>Others</i>                   |                                       |                |
| BRD4_HUMAN                      | Bromodomain-containing protein 4      | 205            |
| TNKS2_HUMAN                     | Tankyrase-2                           | 120            |
| HYES_HUMAN                      | Bifunctional epoxide hydrolase 2      | 93             |
| PK3CG_HUMAN                     | PI3-kinase subunit gamma              | 88             |
| POL_HV1B1                       | Gag-Pol polyprotein                   | 77             |
|                                 |                                       |                |
| Total                           | 17 different proteins                 | 2619           |

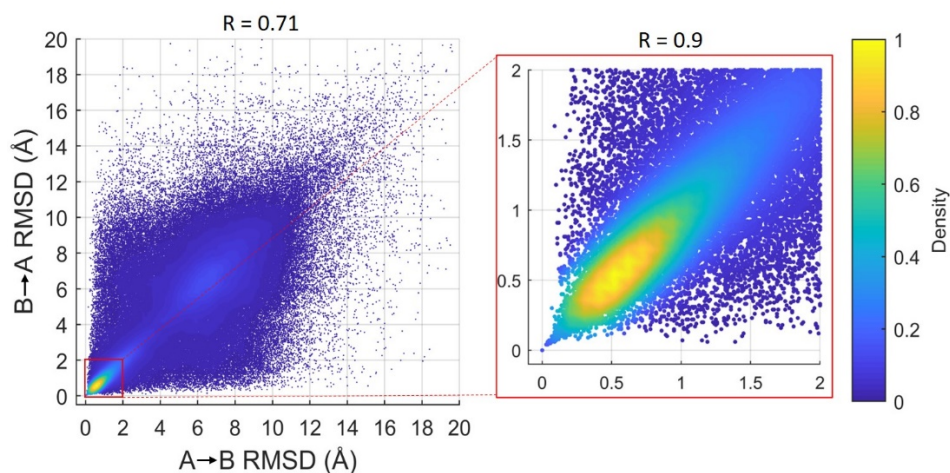

**Figure S1** Relationship between the calculated RMSDs of two superimposed ligands when the query ligand and the template ligand are switched. RMSD of A→B is the RMSD between ligand A and ligand B when A is set as the query ligand and B as the template ligand. RMSD of B→A is vice versa. The right panel shows the cases that have low RMSD values ( $\leq 2.0$  Å).

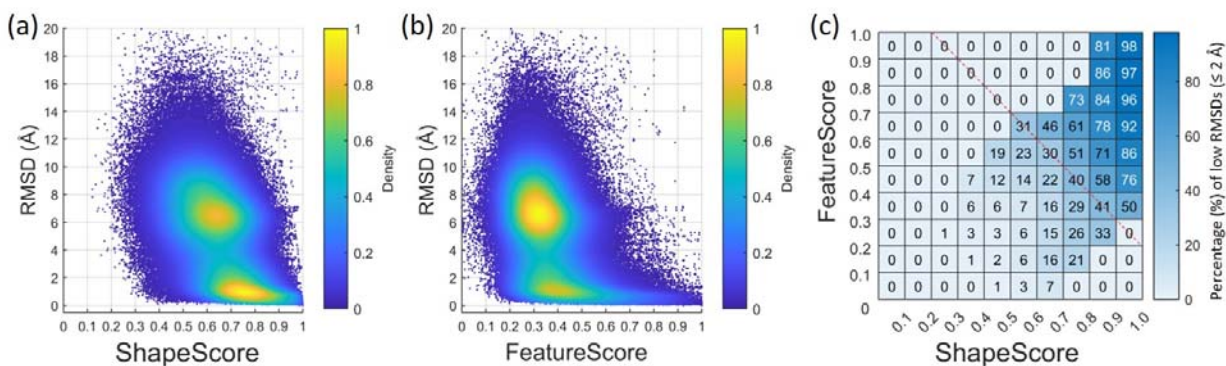

**Figure S2** Elaborative studies of Figure 2(b). Distributions of the ligand RMSDs vs corresponding ShapeScores (a) or FeatureScores (b) for all the cases in the protein-ligand dataset. (c) Percentages of the cases with low RMSD values ( $\leq 2.0$  Å) for different ranges of ShapeScore and FeatureScore. The value “0” in a cell means there were not enough data (fewer than 100 cases) for the calculation. The broken red line corresponds to the cases with the SHAFTS score (namely, ShapeScore + FeatureScore) of around 1.2.

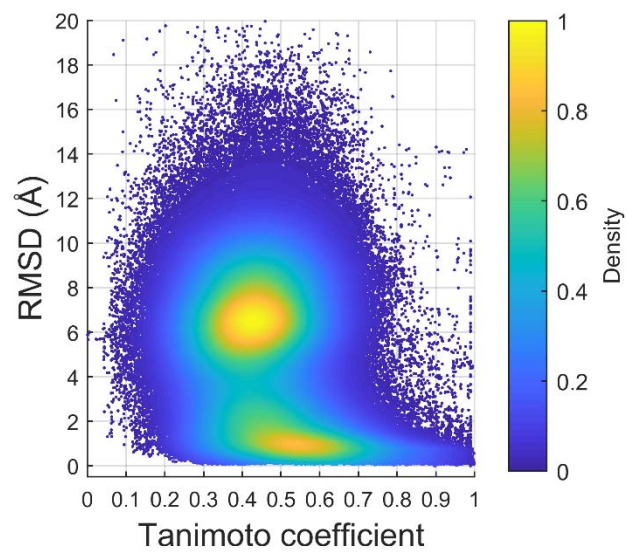

**Figure S3** Elaborative studies of Figure 2(b). Distributions of the ligand RMSDs vs corresponding Tanimoto coefficients for all the cases in the protein-ligand dataset.
